# Supplementary material for: Consequences of PDGFRα+ fibroblast reduction in adult murine hearts
Source: eLife journal article supplement (doi:10.7554/elife.69854), 2022-09-23
Supplement: supp [file elife_poa_e69854_Figure_1_figure_supplement_1.pdf › elife_poa_e69854_Figure_1_figure_supplement_1.pdf]

**Figure 1–figure supplement 1**

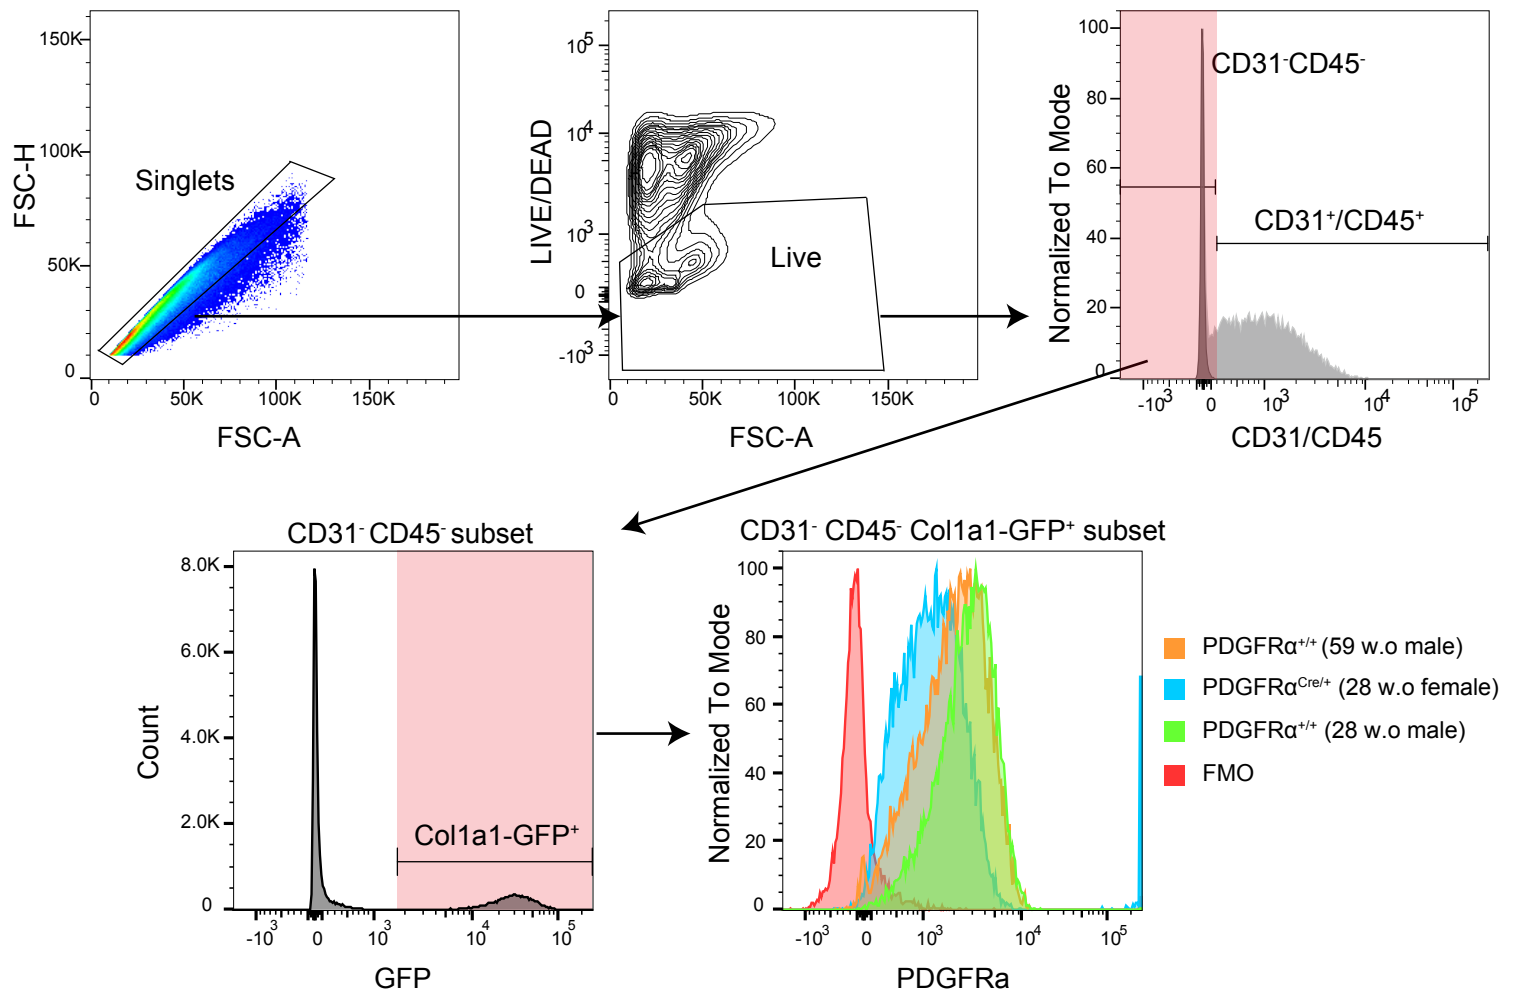

**Figure 1–figure supplement 1. PDGFRα detection by flow cytometry. Gating strategy for PDGFRα expression.**
