# Supplementary material for: Consequences of PDGFRα+ fibroblast reduction in adult murine hearts
Source: eLife journal article supplement (doi:10.7554/elife.69854), 2022-09-23
Supplement: supp [file elife_poa_e69854_Figure_1_figure_supplement_3.pdf › elife_poa_e69854_Figure_1_figure_supplement_3.pdf]

Figure 1–figure supplement 3

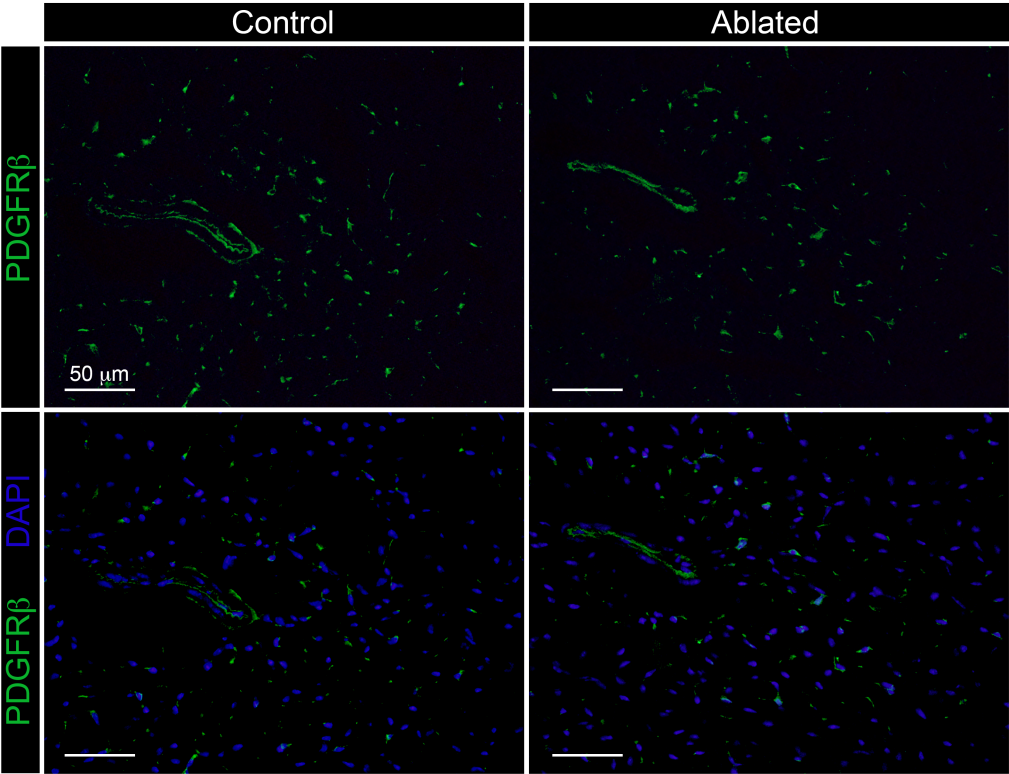

**Figure 1–figure supplement 3. PDGFRβ expressing cells.** Representative images of PDGFRβ immunostaining at 14 days post-induction in 6-week-old animals. Control: n=3; ablated n=4.
