# Supplementary material for: Consequences of PDGFRα+ fibroblast reduction in adult murine hearts
Source: eLife journal article supplement (doi:10.7554/elife.69854), 2022-09-23
Supplement: supp [file elife_poa_e69854_Figure_3_figure_supplement_3.pdf › elife_poa_e69854_Figure_3_figure_supplement_3.pdf]

Figure 3-figure supplement 3

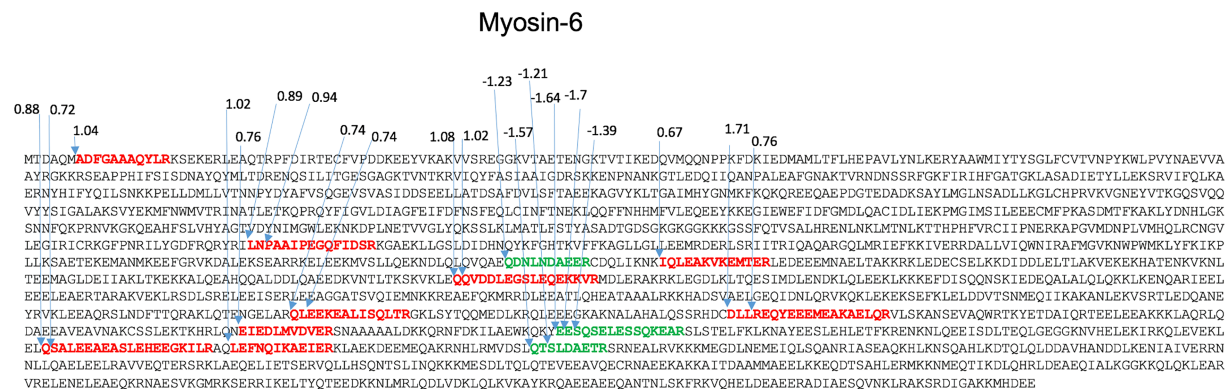

**Figure 3-figure supplement 3. Potential proteolytically cleaved peptides mapped on myosin-6.** Sequence of myosin-6 showing the locations of the internal peptides identified and indicating the respective increase (red peptides) or decrease (green peptides) in 1092 ratios of control/ablated levels. See also Supplemental Tables 3 and 4.
