# Supplementary material for: Consequences of PDGFRα+ fibroblast reduction in adult murine hearts
Source: eLife journal article supplement (doi:10.7554/elife.69854), 2022-09-23
Supplement: supp [file elife_poa_e69854_Figure_4_figure_supplement_1.pdf › elife_poa_e69854_Figure_4_figure_supplement_1.pdf]

Figure 4–figure supplement 1

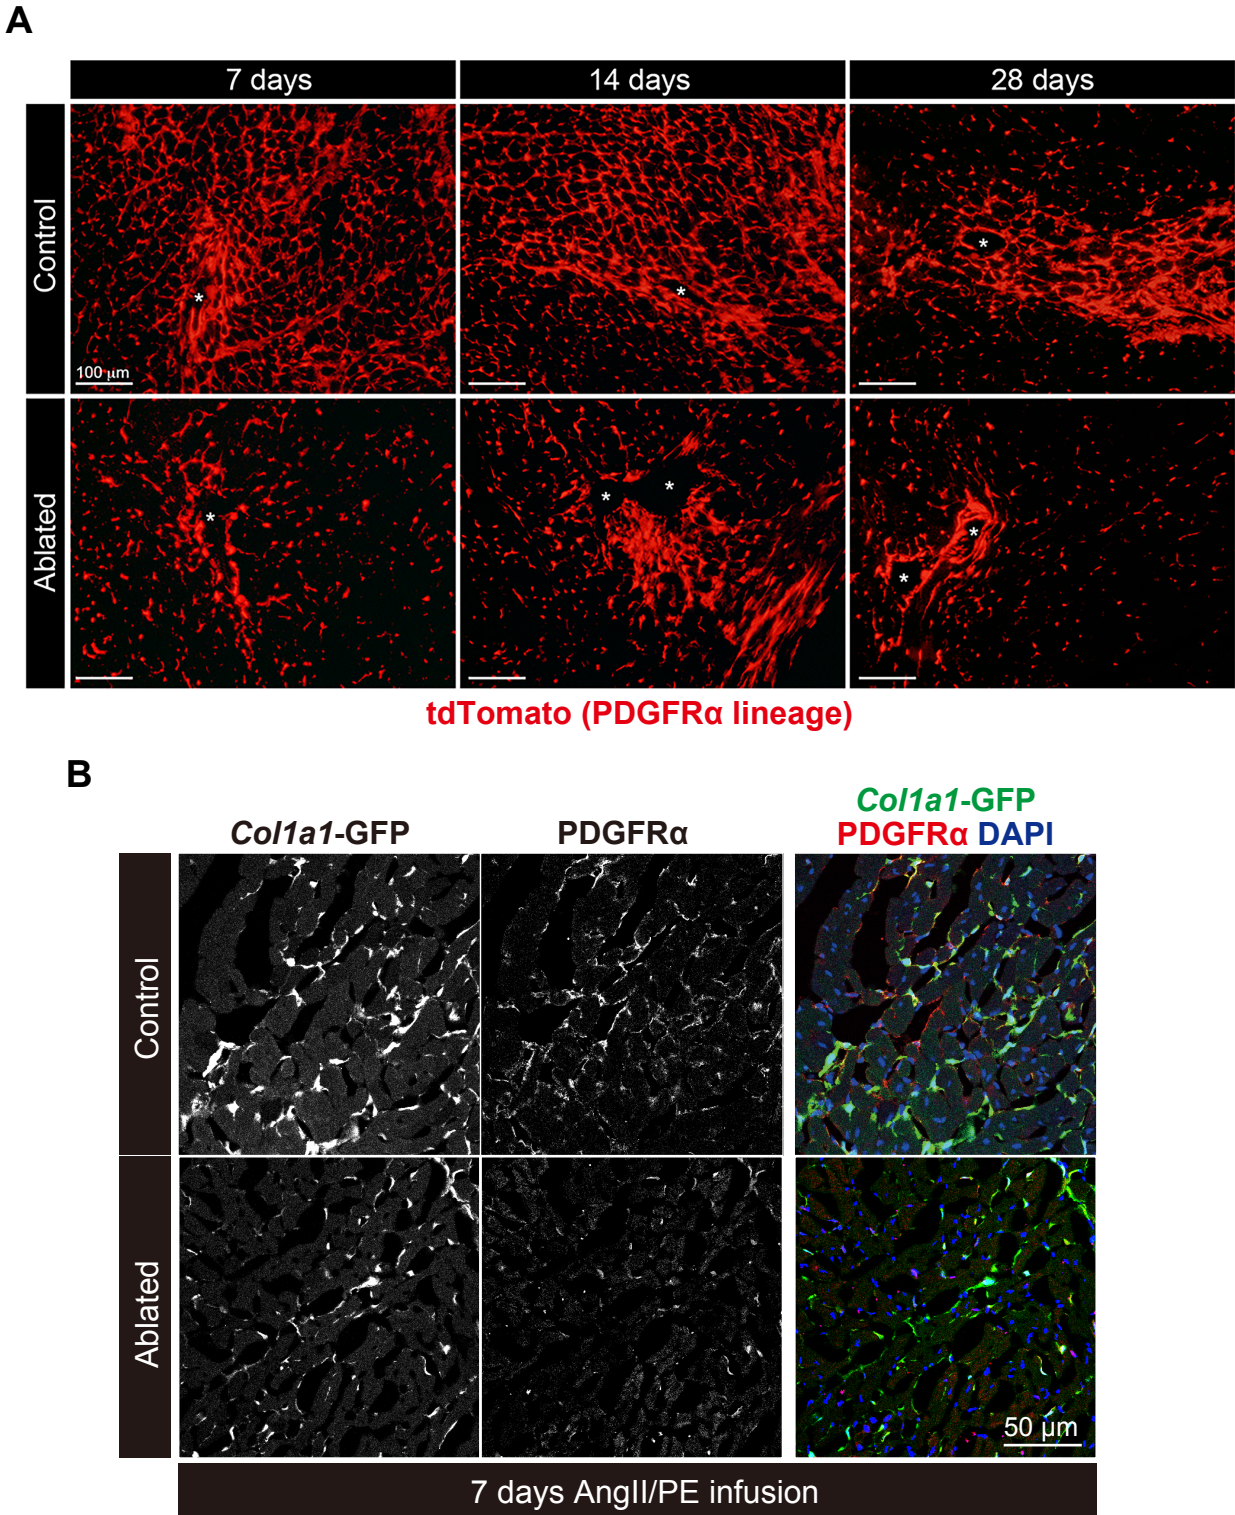

**Figure 4–figure supplement 1. Fibroblast expansion after AngII/PE infusion.** (A) PDGFR $\alpha$  cell expansion after AngII/PE infusion. Representative images of PDGFR $\alpha$  lineage cells in the LV myocardium at 7, 14, and 28 days of AngII/PE infusion. Asterisks indicate blood vessels. Representative of control: n=3; ablated: n=3 at each timepoint. (B) Immunohistochemistry of PDGFR $\alpha$  at 7 days post AngII/PE infusion. Representative of control: n=3; ablated: n=4.
