# Supplementary material for: Consequences of PDGFRα+ fibroblast reduction in adult murine hearts
Source: eLife journal article supplement (doi:10.7554/elife.69854), 2022-09-23
Supplement: supp [file elife_poa_e69854_Figure_5_figure_supplement_1.pdf › elife_poa_e69854_Figure_5_figure_supplement_1.pdf]

Figure 5–figure supplement 1

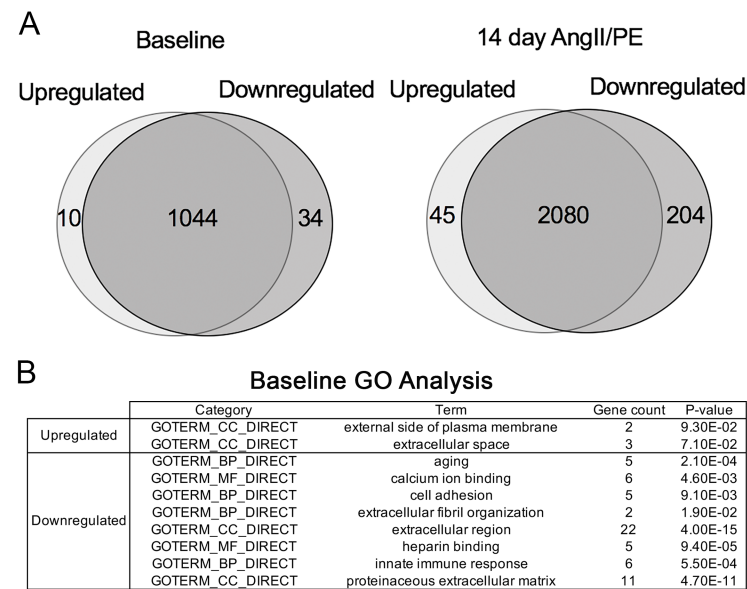

**Figure 5–figure supplement 1. Differentially expressed genes at baseline and after 14 days of AngII/PE infusion.** (A) Venn diagrams of differentially expressed genes comparing ablated to controls at baseline (left) and after AngII/PE (right). (B) GO analysis of differentially expressed genes between control and ablated hearts at baseline (7 weeks after induction). Control: n=4; ablated: n=5. All genes included had fold change values of  $\log_2 \geq 2$  or  $\leq -2$  and  $P \leq 0.05$ .
