# Supplementary material for: Consequences of PDGFRα+ fibroblast reduction in adult murine hearts
Source: eLife journal article supplement (doi:10.7554/elife.69854), 2022-09-23
Supplement: supp [file elife_poa_e69854_Figure_8_figure_supplement_1.pdf › elife_poa_e69854_Figure_8_figure_supplement_1.pdf]

Figure 8–figure supplement 1

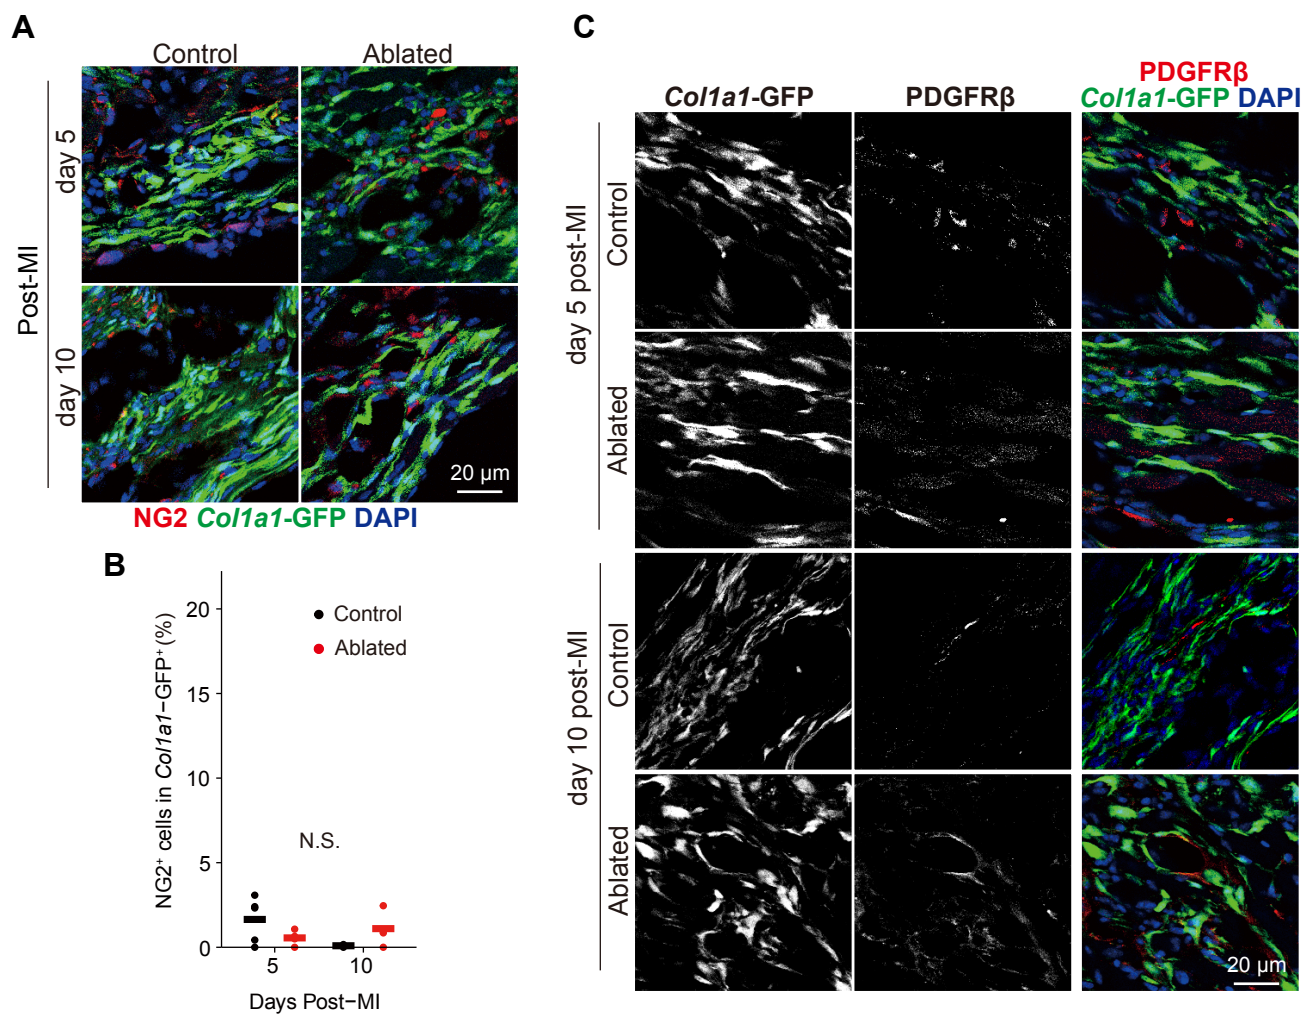

**Figure 8–figure supplement 1. Mural cell contribution after MI.** (A, B) NG2 and (C) PDGFR $\beta$  lineage expansion at the indicated time points. Representative of immunostaining images are shown in A and C. Control: n=4, 3; ablated: n=4, 3 (5 and 10 days post-MI, respectively). Statistical significance was determined by a two-way ANOVA with Tukey test. ns: not significant.
