# Supplementary figures and images for: Consequences of PDGFRα+ fibroblast reduction in adult murine hearts
Source: eLife journal article supplement (doi:10.7554/elife.69854), 2022-09-23

Figure 1-source data 1: full unedited western blots.

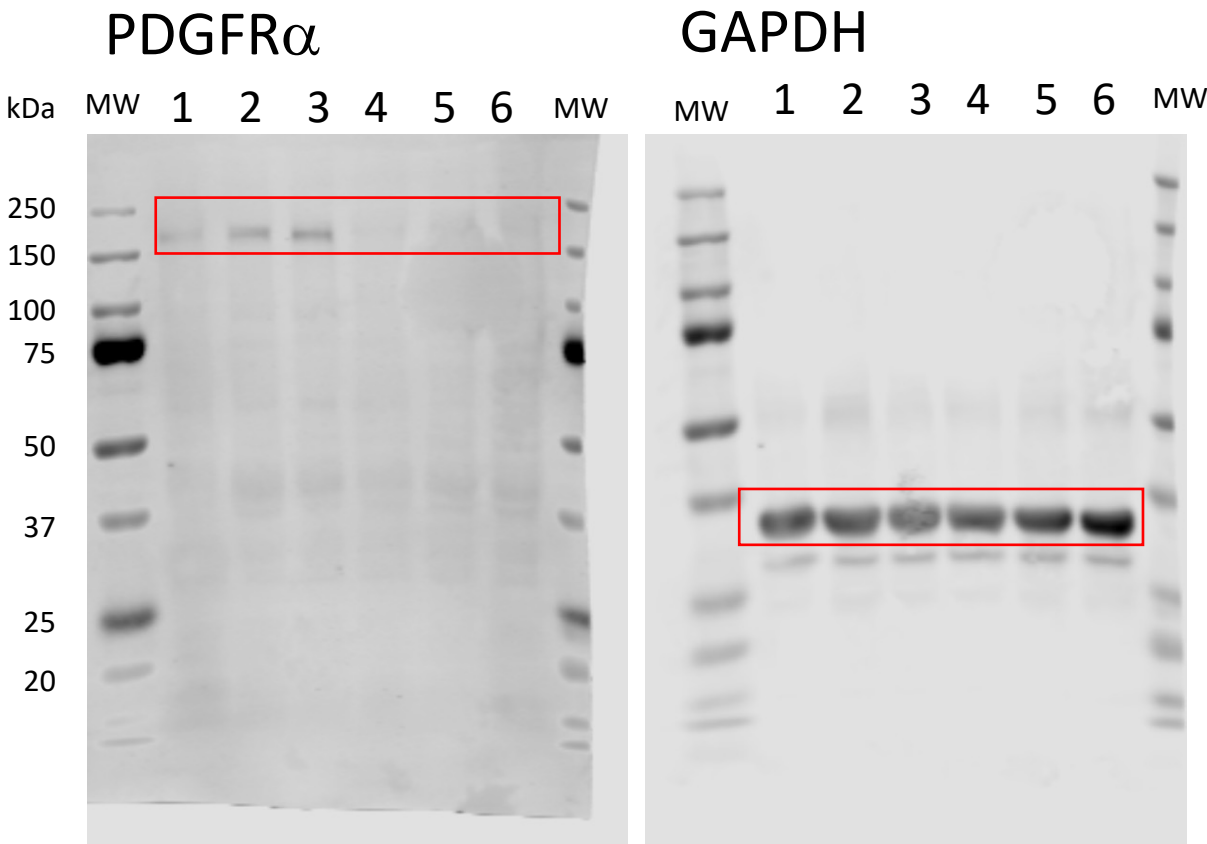

Lanes 1-3 control  
Lanes 4-6 ablated

Supplement: fig1-data1 [file elife-69854-fig1-data1-v2.zip]

Figure 3 -source data 1: full unedited zelatin zymogram

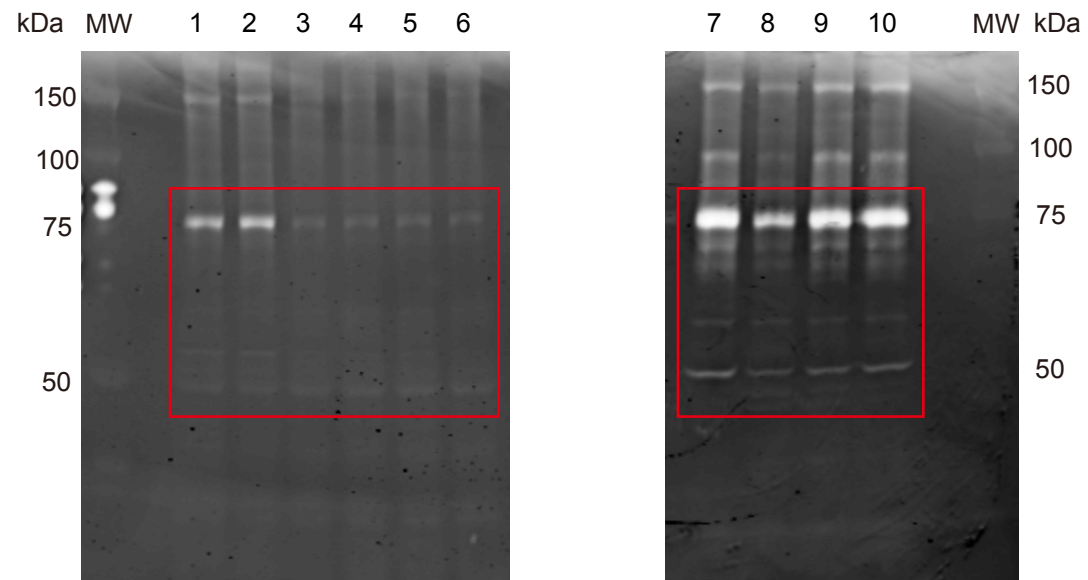

Lane 1-2, 7-8 control  
Lane 3-6, 9-10 ablated

Supplement: fig3-data1 [file elife-69854-fig3-data1-v2.zip]

Figure 2-source data 1: full unedited western blots.

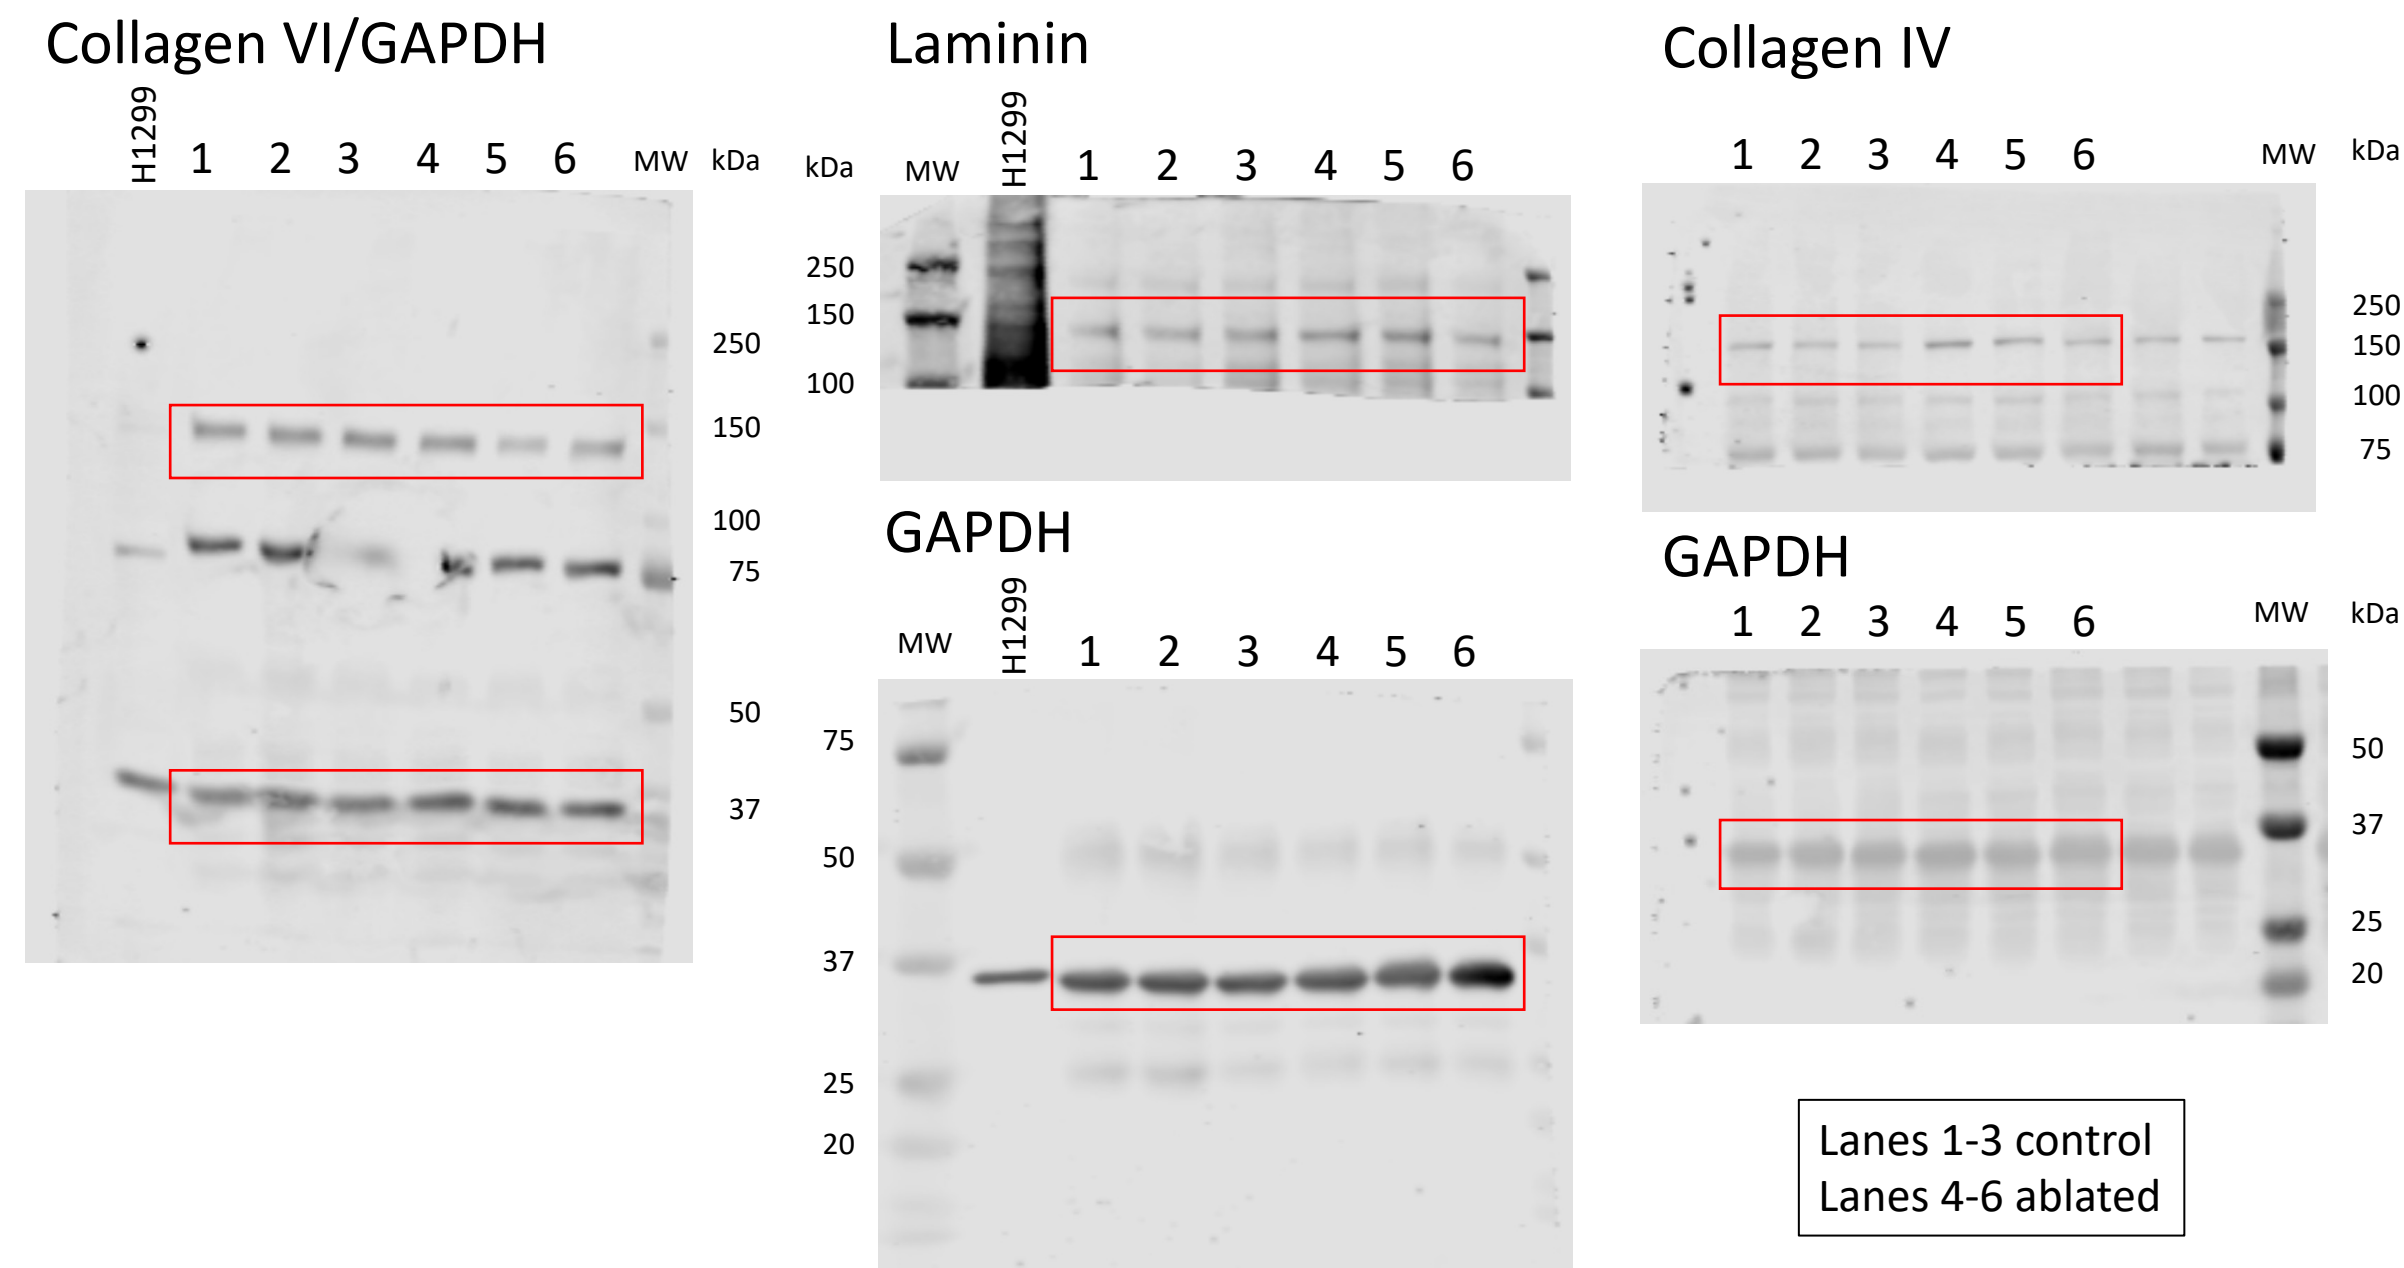

Supplement: supp [file Figure 2-source data 1.pdf › Figure 2-source data 1.pdf]
